# Supplementary material
Source: HighWire-hosted journal article supplement (https://dmd.aspetjournals.org/content/suppl/2016/05/13/dmd.115.067512)

**DMD # 67512 Supplemental data**

**Supplemental Data**

**Title: Metabolism and Disposition of Hepatitis C Polymerase Inhibitor**

**Dasabuvir in Humans**

Authors: Jianwei Shen, Michael Serby, Aimee Reed, Anthony J. Lee, Rajeev Menon, Xiaomei Zhang, Kennan Marsh, Xia Wan, Olga Kavetskaia, Volker Fischer

Drug Metabolism and Pharmacokinetics (J.S., M.S., A.L., X.Z., V.F.); Process Chemistry (A.R.);  
Drug Analysis (O.K., X.W.); Exploratory Science (K.M.), CPPM-Clinical PK/PD (R.M.)

AbbVie, 1 N. Waukegan Road, North Chicago, IL 60064

Drug Metabolism and Disposition

# DMD # 67512 Supplemental data

## Additional MS/MS Spectra of metabolites

F: FTMS - c ESI d Full ms2 492.16@cid35.00 [125.00-505.00]

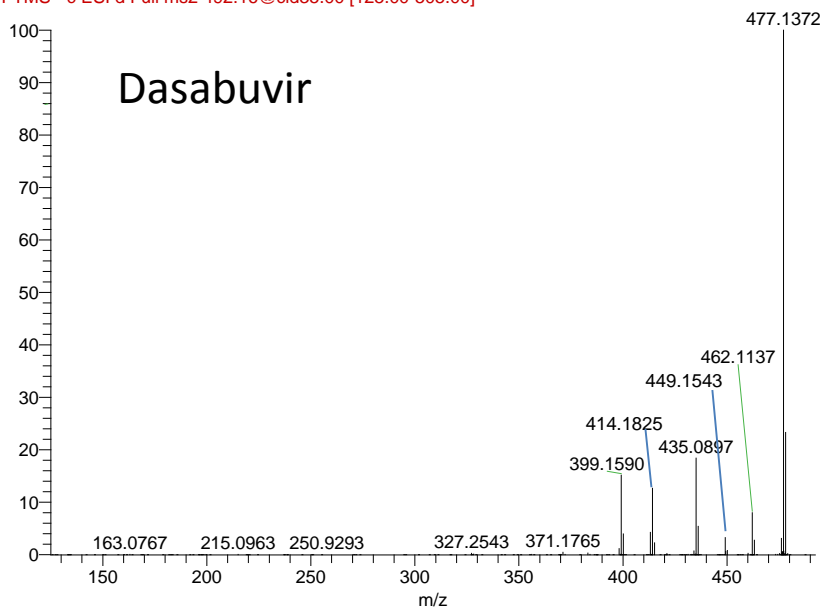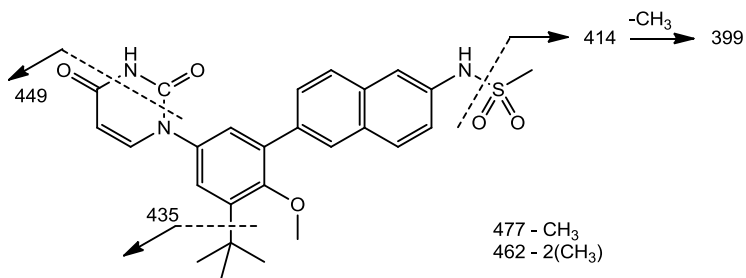

# DMD # 67512 Supplemental data

F: FTMS - c ESI d Full ms2 508.15@cid35.00 [125.00-520.00]

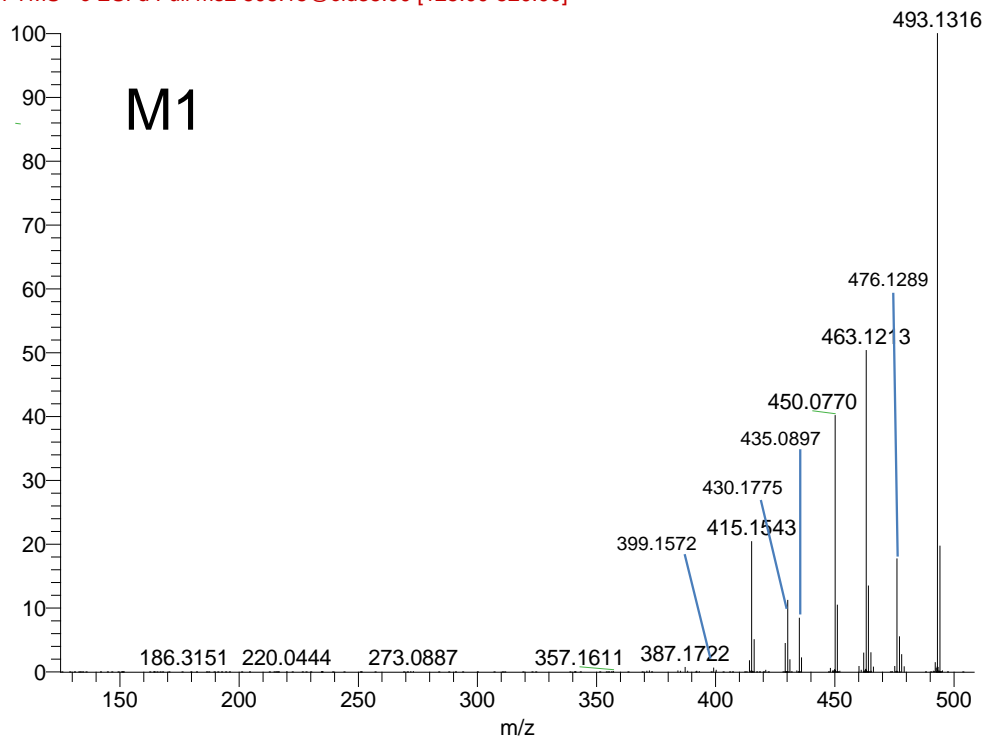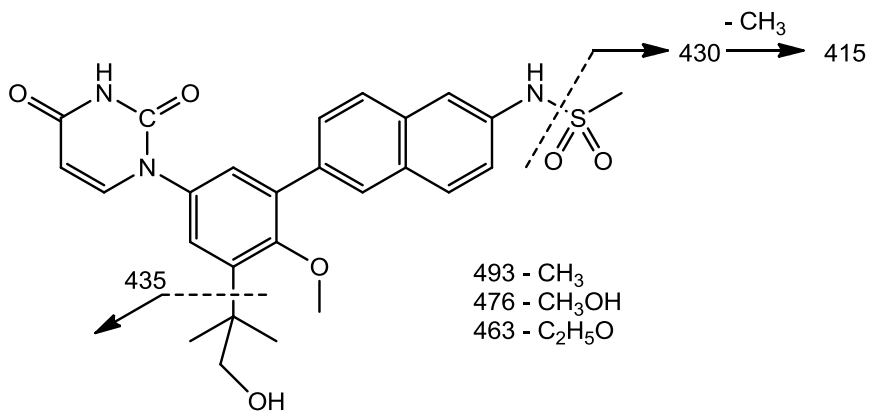

DMD # 67512 Supplemental data

F: FTMS - c ESI d Full ms2 588.11 @cid35.00 [150.00-600.00]

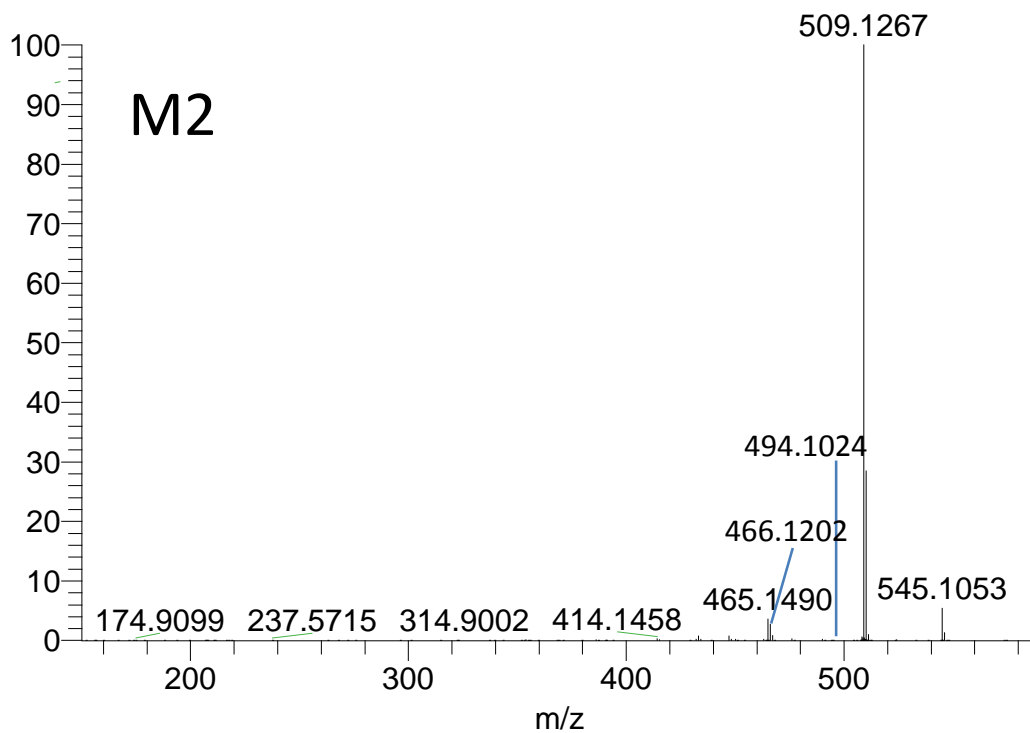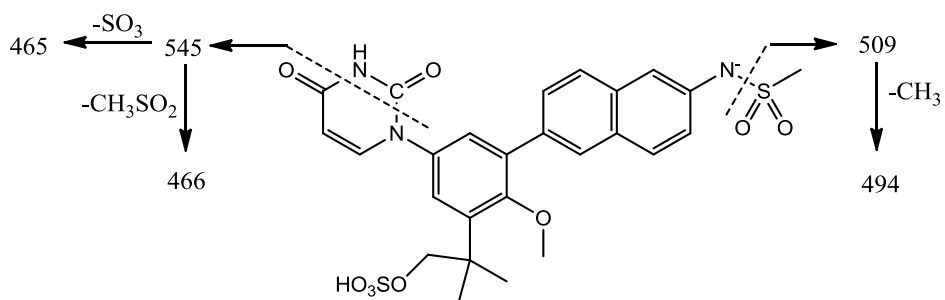

DMD # 67512 Supplemental data

F: FTMS - c ESI d Full ms2 684.19@cid35.00 [175.00-695.00]

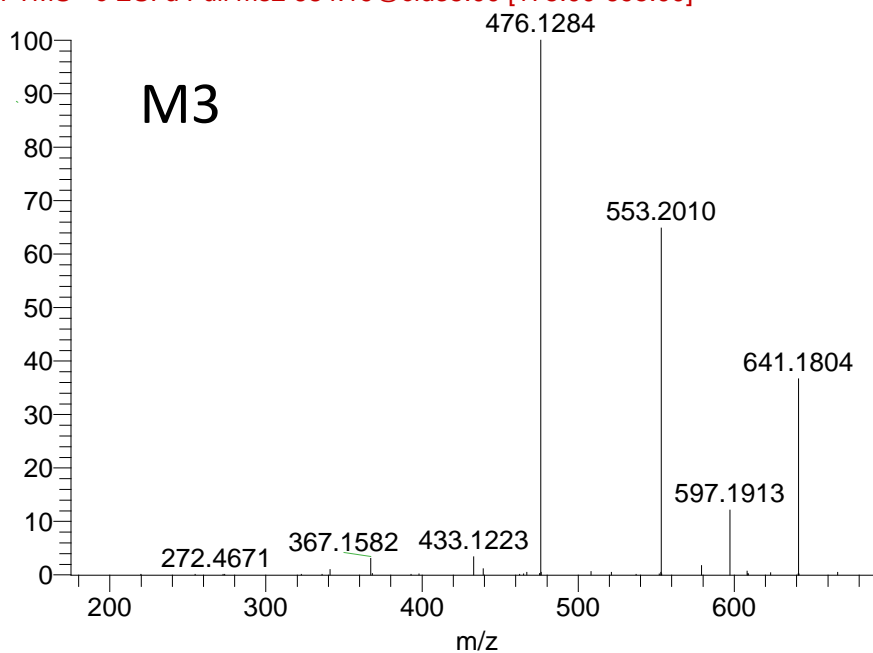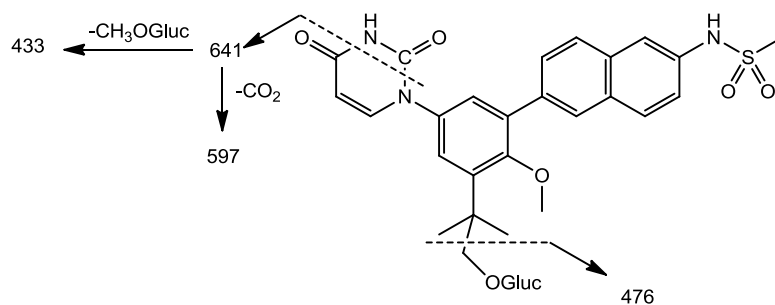

DMD # 67512 Supplemental data

F: FTMS - c-ESI d Full ms2 506.14@cid35.00 [125.00-520.00]

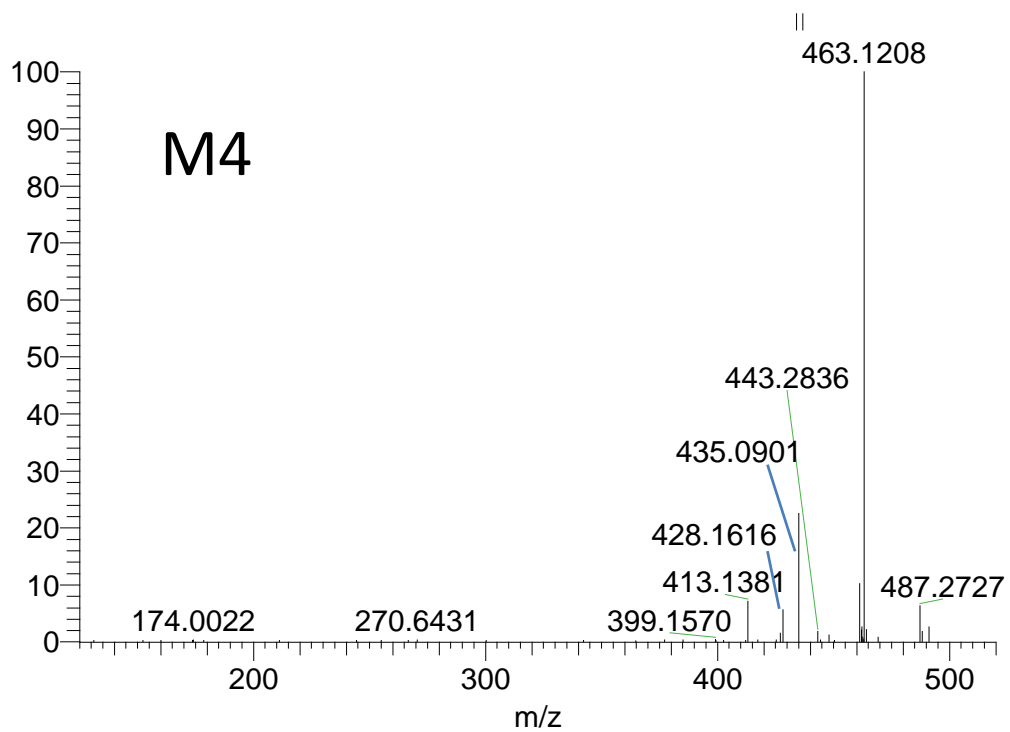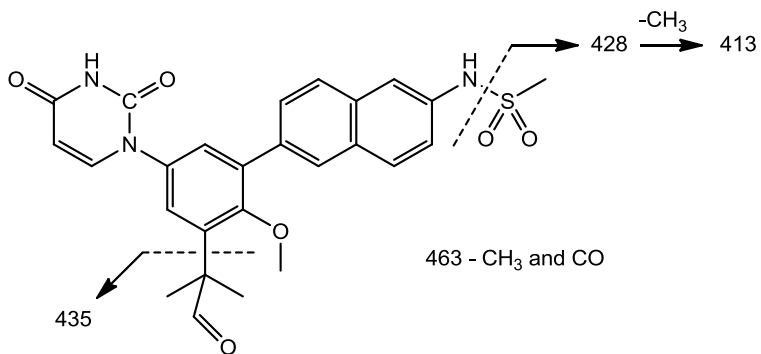

# DMD # 67512 Supplemental data

F: FTMS - c ESI d Full ms2 522.13@cid35.00 [130.00-535.00]

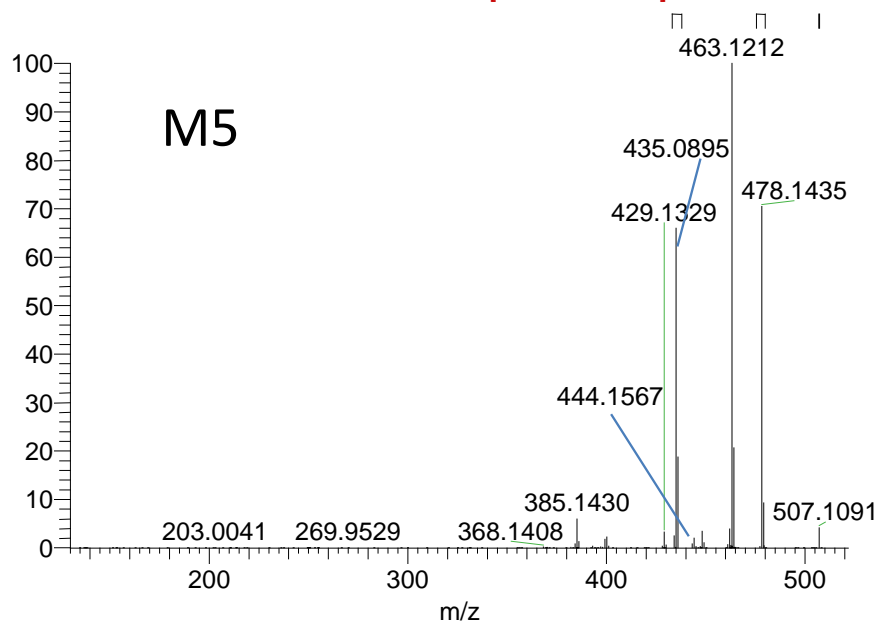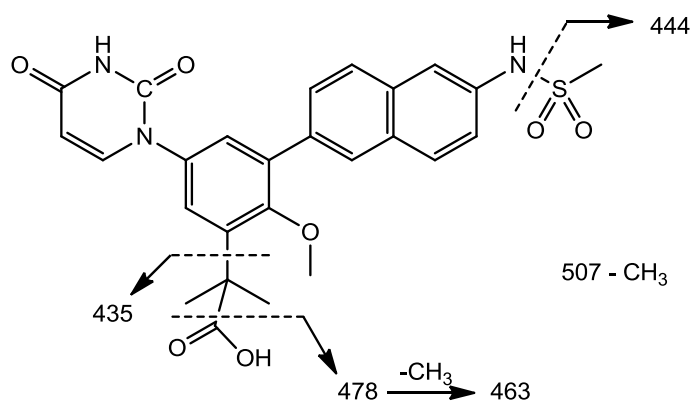

DMD # 67512 Supplemental data

F: FTMS - c ESI d Full ms2 698.17@cid35.00 [180.00-710.00]

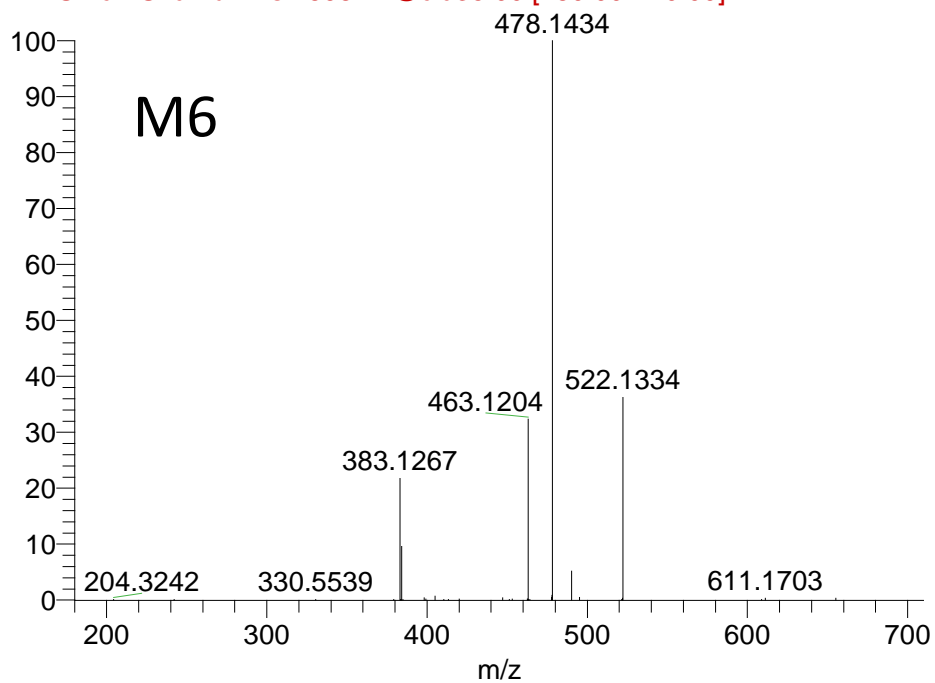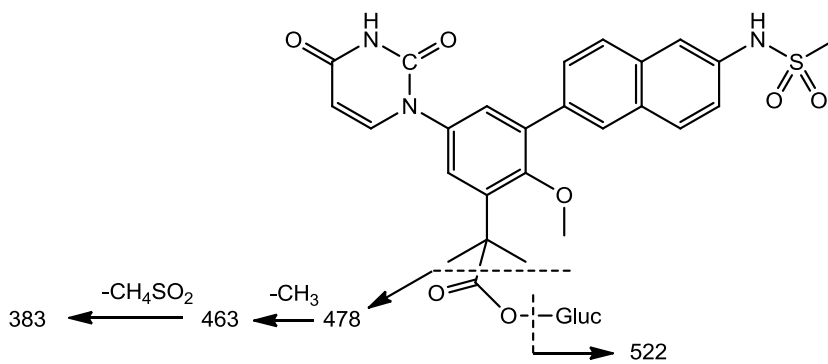



DMD # 67512 Supplemental data

F: FTMS - c ESI d Full ms2 700.18@cid35.00 [180.00-715.00]

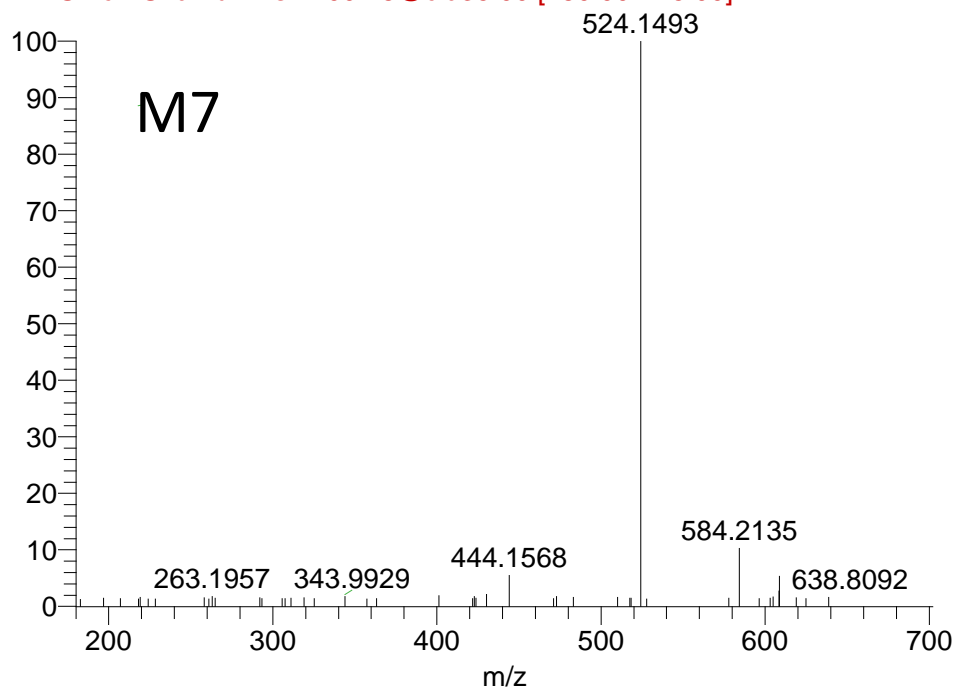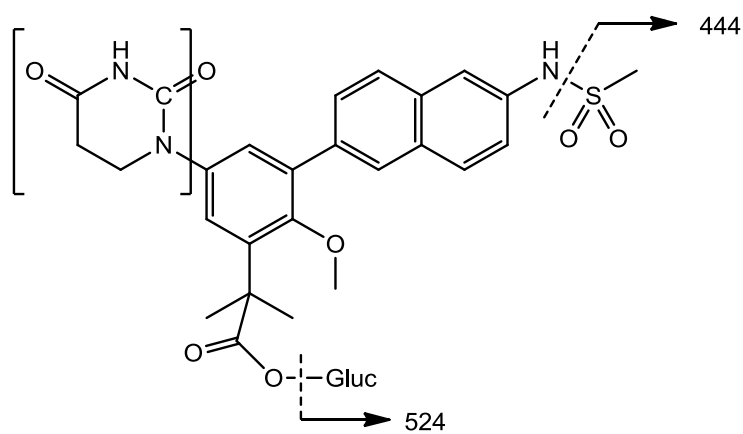

# DMD # 67512 Supplemental data

F: FTMS—e ESI d Full ms2 524.15@cid35.00 [130.00-535.00]

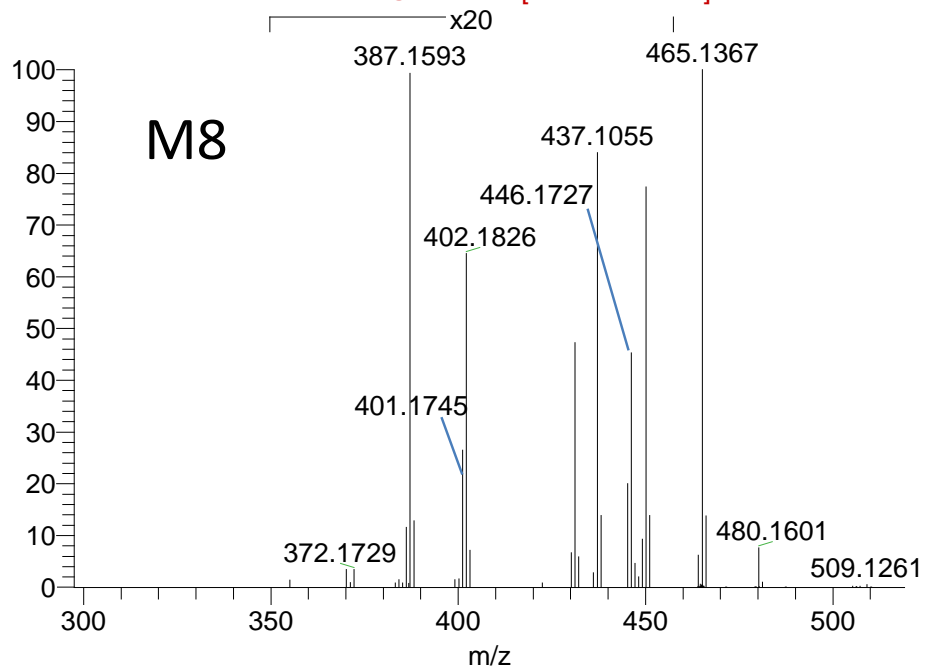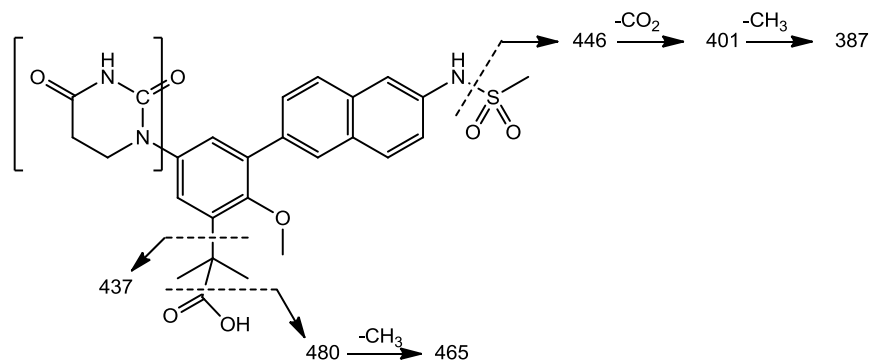

DMD # 67512 Supplemental data

F: FTMS - c ESI d Full ms2 510.17@cid35.00 [130.00-525.00]

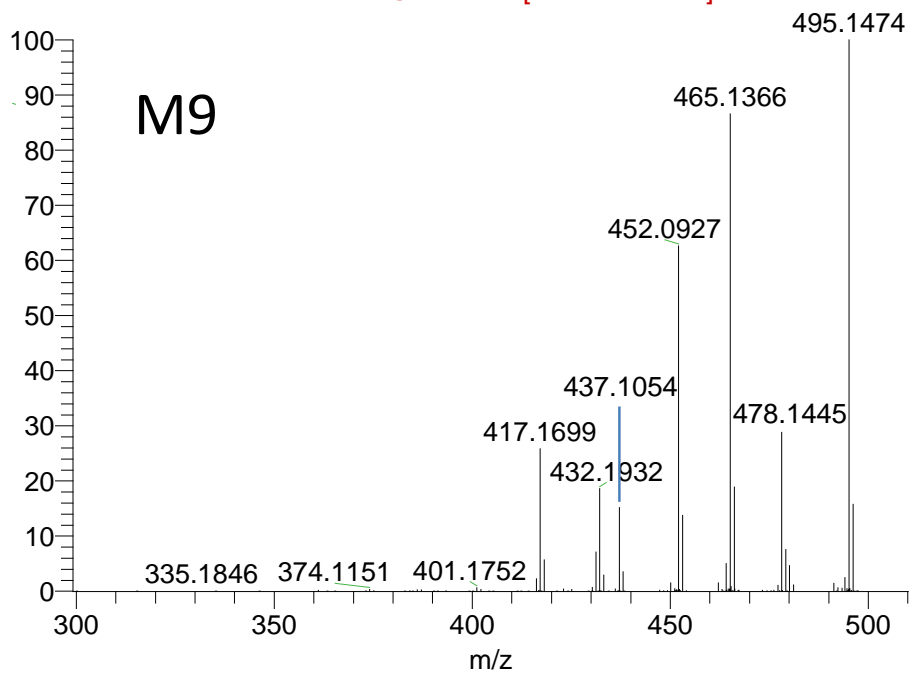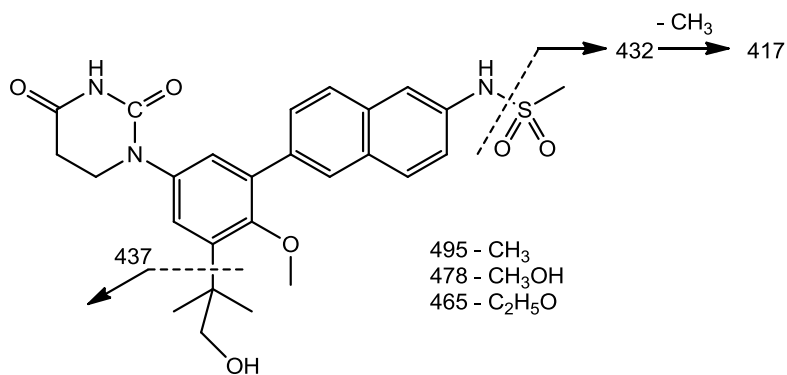

# DMD # 67512 Supplemental data

F: FTMS -e-ESI d Full ms2 494.14@cid35.00 [125.00-505.00]

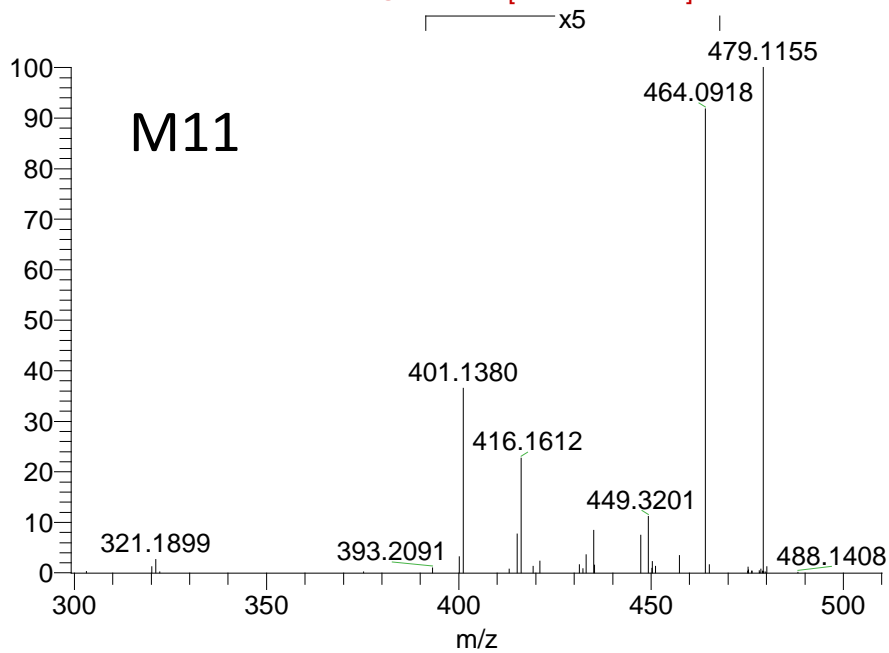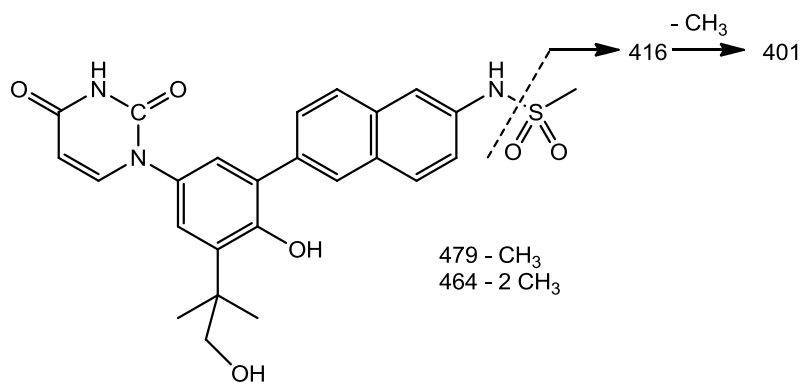

Supplement: Supplemental_67512.pdf [file Supplemental_67512.pdf]
